# Supplementary material for: Computational and in vitro evaluation of sumac-derived ©Rutan compounds towards Sars-CoV-2 Mpro inhibition
Source: Front Pharmacol. 2025 Feb 4;16:1518463. doi: 10.3389/fphar.2025.1518463 (PMC11832515; doi:10.3389/fphar.2025.1518463)
Supplement: Supplementary file 1 [file Table1.docx]

**Supplementary materials**

**Computational and In Vitro Evaluation of Sumac-Derived ©Rutan Compounds Towards Sars-CoV-2 Mpro Inhibition**

**Muzaffar Kayumov1,*,†, Parthiban Marimuthu2,3,†, Jamoliddin Razzokov4,5,6, Nurkhodja Mukhamedov1,7, Akmal Asrorov1, Nodir S. Berdiev1, Jamolitdin F. Ziyavitdinov1, Ansor Yashinov1,8, Yuliya Oshchepkova1, Shavkat Salikhov1, Sharafitdin Mirzaakhmedov1**

1Institute of Bioorganic Chemistry, AS of Uzbekistan, 83 M.Ulughbek Street, 100125 Tashkent, Uzbekistan

2Pharmaceutical Science Laboratory (PSL-Pharmacy) and Structural Bioinformatics Laboratory (SBL-Biochemistry), Faculty of Science and Engineering, Åbo Akademi University, FI-20520 Turku, Finland

3Center for Global Health Research, Saveetha Medical College, Saveetha Institute of Medical and Technical Sciences, Chennai 602 105, India.

4Institute of Fundamental and Applied Research, National Research University TIIAME, Kori Niyoziy 39, 100000 Tashkent, Uzbekistan

5Department of Natural Sciences, Shakhrisabz State Pedagogical Institute, Shakhrisabz Street 10, Kashkadarya 181301, Uzbekistan

6Department of Biotechnology, Tashkent State Technical University, Universitet 2, Tashkent 100095, Uzbekistan

7Department of Natural Compounds and Applied Chemistry, National University of Uzbekistan, Tashkent 100174, Uzbekistan

8Shanghai Institute of Materia Medica, Chinese Academy of Sciences, Shanghai, China

*Authors to whom correspondence should be addressed.

† These authors contributed equally

**Table S1.** The MMGBSA-based energy estimation for five different Rutan compounds interacting with Mpro

| **Replicates** | **R5** | **R6** | **R7** | **R7`** | **R8** |
| --- | --- | --- | --- | --- | --- |
| 1 | -94.633 | -56.719 | -65.342 | -98.579 | -103.415 |
| 2 | -103.462 | -109.780 | -45.238 | -84.530 | -104.466 |
| 3 | -76.077 | -110.830 | -70.758 | -96.570 | -119.165 |
| 4 | -79.298 | -83.335 | -83.948 | -95.421 | -90.664 |
| 5 | -52.105 | -108.105 | -70.931 | -85.466 | -104.103 |
| **Average** | **-81.115** | **-93.754** | **-67.243** | **-92.113** | **-104.363** |
